# Supplementary material for: Income-related inequalities affect the association between obesity and periodontal disease: A cross-sectional analysis in Tokyo Metropolitan Districts
Source: Research Square preprint supplement (doi:10.21203/rs.3.rs-6299667/v1), 2025-04-08
Supplement: Supplementary file 1 [file ec11341c3a59597be7eb4855.docx]

**Supplementary Table 1.** Goodness of fit of the multivariate models in Table 2

|  |  | AIC | BIC |
| --- | --- | --- | --- |
| Crude model | |  |  |
|  | BMI | 28543.7 | 28563.2 |
|  | Income | 29064.0 | 29078.6 |
| Multivariate model | |  |  |
|  | Model 1 | 29107.6 | 29156.8 |
|  | Model 2 | 27166.6 | 27225.0 |
|  | Model 3 | 27106.0 | 27174.2 |

AIC, Akaike Information Criterion; BIC, Bayesian Information Criterion; BMI: Body Mass Index
